# Supplementary material for: Incidence and determinants of hypophosphatemia in diabetic ketoacidosis: an observational study
Source: HighWire-hosted journal article supplement (doi:10.1136/bmjdrc-2020-002018), 2021-02-01
Supplement: bmjdrc-2020-002018supp001_data_supplement.pdf [file bmjdrc-2020-002018supp001_data_supplement.pdf]

## Supplements

### S1. Baseline characteristics of both centres.

| <b>Demographics</b>                         | UMCG (n=99)      | Isala(n=28)      | p           |
|---------------------------------------------|------------------|------------------|-------------|
| Age [years]                                 | 28.4 [21.9-45.3] | 30.7 [21.1-37.1] | .626        |
| Female gender (%)                           | 53 (54)          | 11 (39)          | .183        |
| BMI (kg/m <sup>2</sup> )                    | 23.1 (4.2)       | 24.8 (5.1)       | .080        |
| Current smoker (%)                          | 46 (46)          | 10 (36)          | .900        |
| Systolic Blood Pressure (mm/hg)             | 127 (22)         | 128 (22)         | .826        |
| Diastolic Blood Pressure (mm/hg)            | 73 (16)          | 75 (16)          | .539        |
| Temperature [°dfC]                          | 36.4 [35.7-37.0] | 36.7 [36.4-37.1] | <b>.041</b> |
| Diabetes duration [years]*                  | 13.0 [7.4-25.9]  | 16.9 [10.6-23.6] | .420        |
| Insulin dose [U/day]*                       | 48 [32-72]       | 24 [23-67]       | .080        |
| Use of MDI (%)*                             | 62 (69)          | 8 (32)           | <b>.001</b> |
| Use of CSII (%)*                            | 28 (31)          | 17 (68)          | <b>.002</b> |
| Use of sensor (%)*                          | 9 (10)           | 3 (13)           | .878        |
| Microvascular complications (%)*            | 41 (46)          | 7 (28)           | .254        |
| Retinopathy (%)*                            | 22 (24)          | 4 (16)           | .358        |
| Nephropathy (%)*                            | 26 (29)          | 3 (12)           | .084        |
| Neuropathy (%)*                             | 15 (17)          | 4 (16)           | .910        |
| Macrovascular complications (%)*            | 16 (18)          | 3 (12)           | .476        |
| Cause DKA                                   |                  |                  |             |
| New onset T1DM (%)                          | 9 (9)            | 3 (11)           | .795        |
| Therapy nonadherence (%)                    | 39 (39)          | 6 (21)           | .079        |
| Infection/inflammation (%)                  | 23 (23)          | 10 (36)          | .184        |
| <b>Laboratory measurements</b>              |                  |                  |             |
| Hb (mmol/L)                                 | 8.8 (1.4)        | 9.2 (0.9)        | .055        |
| White blood cell count [10 <sup>9</sup> /L] | 18.6 [12.0-25.3] | 16.3 [11.1-21.2] | .471        |
| Platelet count (10 <sup>9</sup> /L)         | 331 (105)        | 340 (81)         | .707        |

---

|                                    |                  |                  |             |
|------------------------------------|------------------|------------------|-------------|
| CRP (mg/L)                         | 8 [4-22]         | 13 [5-20]        | .198        |
| Serum creatinine (μmol/L)          | 88 [70-124]      | 83 [69-112]      | .695        |
| eGFR (ml/min/1.73 m <sup>2</sup> ) | 79.8 (36.7)      | 70.0 (36.6)      | .361        |
| Serum sodium (mmol/L)              | 135 (7)          | 132 (5)          | <b>.044</b> |
| Serum potassium (mmol/L)           | 5.2 (1.1)        | 5.2 (0.9)        | .882        |
| Serum glucose [mmol/L]             | 33 [25-43]       | 29 [25-35]       | .273        |
| Serum phosphate [mmol/L]           | 1.63 [1.34-2.70] | 2.13 [1.36-2.97] | .477        |
| Serum calcium [mmol/L]             | 2.40 [2.28-2.48] | 2.36 [2.25-2.46] | .222        |
| Serum urea [mmol/L]                | 9.3 [6.2-12.5]   | 7.6 [5.6-11.2]   | .333        |
| Serum chloride (mmol/L)            | 93 (8)           | 93 (9)           | .927        |
| Serum albumin (mmol/L)             | 45 (5)           | 44 (6)           | .358        |
| LDH [U/l]                          | 196 [171-242]    | 172 [139-211]    | <b>.005</b> |
| ASAT [U/l]                         | 23 [15-31]       | 22 [16-39]       | .849        |
| ALAT [U/l]                         | 21 [14-34]       | 24 [14-42]       | .288        |
| Alkaline phosphatase (U/l)         | 144 (59)         | 124 (53)         | .120        |
| Gamma-GT [U/l]                     | 25 [19-46]       | 21 [14-49]       | .327        |
| Bilirubine total [μmol/l]          | 4 [3-10]         | 9 [6-12]         | <b>.008</b> |
| pH [kPa]                           | 7.13 [7.00-7.21] | 7.16 [7.05-7.21] | .473        |
| Serum bicarbonate (mmol/L)         | 8.0 (4.4)        | 9.2 (3.5)        | .157        |
| Arterial pCO <sub>2</sub> (kPa)    | 3.0 (1.2)        | 3.7 (1.3)        | <b>.015</b> |
| Arterial saturation [%]            | 98 [97-98]       | 97 [87-98]       | .344        |
| Lactate [mmol/L]                   | 3.0 [2.0-4.4]    | 4.1 [2.6-4.1]    | .471        |
